1 CTCF mediates the Activity-by-contact derived cis-regulatory hubs

2

3 Mick Lee<sup>1,2\*</sup>, Loïc Mangnier<sup>3,4,5,6\*</sup>, Cory C. Padilla<sup>7</sup>, Dominic Paul Lee<sup>1,2</sup>, Wilson Tan<sup>1,2</sup>, Peter  
4 Yiqing Li<sup>1,2</sup>, Wen Hao Zheng<sup>1,2</sup>, Louis Gan<sup>1,2</sup>, Ching Kit Chen<sup>1,2,8,9</sup>, Yee Phong Lim<sup>1,2,8</sup>, Rina Miao  
5 Qin Wang<sup>1,2,8</sup>, Steve Bilodeau<sup>5,6,10,11</sup>, Alexandre Bureau<sup>3,4,5</sup>, Roger Sik-Yin Foo<sup>1,2#</sup>,  
6 Chukwuemeka George Anene-Nzelu<sup>1,2,12,13#</sup>

7

8 <sup>1</sup>Cardiovascular Disease Translational Research Programme, Yong Loo Lin School of  
9 Medicine, National University of Singapore, Singapore

10 <sup>2</sup>Genome Institute of Singapore, A\*STAR, Singapore

11 <sup>3</sup>Centre de Recherche CERVO, Quebec City, Canada.

12 <sup>4</sup>Département de Médecine Sociale et Préventive, Université Laval, Quebec City, Canada.

13 <sup>5</sup>Centre de Recherche en données Massives de l'Université Laval, Québec, Québec, Canada,  
14 G1V 0A6.

15 <sup>6</sup>Centre de Recherche du Centre Hospitalier Universitaire de Québec – Université Laval, axe  
16 oncologie, Québec, Québec, Canada, G1R 3S3.

17 <sup>7</sup>Cantata Bio, 100 Enterprise Way Suite A-101 Scotts Valley, CA 95066

18 <sup>8</sup>Department of Paediatrics, Yong Loo Lin School of Medicine, National University of  
19 Singapore, Singapore

20 <sup>9</sup>Khoo Teck Puat-National University Children's Medical Institute, National University of  
21 Singapore, Singapore

22 <sup>10</sup>Centre de Recherche sur le Cancer de l'Université Laval, Québec, Québec, Canada, G1R  
23 3S3.

24 <sup>11</sup>Département de Biologie Moléculaire, Biochimie Médicale et Pathologie, Faculté de  
25 Médecine, Université Laval, Québec, Québec, Canada, G1V 0A6.

26 <sup>12</sup>Montreal Heart Institute, Montreal, Quebec, Canada

27 <sup>13</sup>Department of Medicine, University of Montreal, Quebec, Canada

28 \*These authors contributed equally

29 #Correspondence [mdccgoa@nus.edu.sg](mailto:mdccgoa@nus.edu.sg), [roger.foo@nus.edu.sg](mailto:roger.foo@nus.edu.sg)

30

31

32

33

34

35

36

37

38

39  
40  
41  
42  
43  
44  
45  
46  
47  
48  
49  
50  
51  
52  
53  
54  
55  
56  
57  
58  
59  
60  
61  
62  
63  
64  
65  
66  
67  
68  
69  
70

## **ABSTRACT**

The 3D chromatin architecture establishes a complex network of genes and regulatory elements necessary for transcriptomic regulation in development and disease. This network can be modeled by cis-regulatory hubs (CRH) which underscore the local functional interactions between enhancers and promoter regions and differ from other higher order chromatin structures such as topological associated domains (TAD). The Activity-by-contact (ABC) model of enhancer-promoter regulation has been recently used in the identification of these CRHs, but little is known about the role of CTCF on the ABC scores and the consequent impact on CRHs. Here we show that the loss of CTCF leads to a reorganization of the enhancer-promoter interactions resulting in a re-distribution of ABC scores of the putative enhancers in C57/bl6 mouse hearts. The loss of CTCF also leads to a global reduction of the total number of CRHs, and an increase in the size of the CRHs due to increase in the number of elements within each hub. In addition, CTCF loss led to more CRHs that cross TAD boundaries. These results provide another layer of evidence to support the importance of CTCF in the formation of regulatory networks necessary for gene regulation.

71

## 72 INTRODUCTION

73

74 The regulation of gene expression by the non-coding genome is an area of rapidly evolving  
75 research globally as it is implicated in different biological phenomena including organ  
76 development, cell-fate determination, tissue response to external stimuli and overall cellular  
77 homeostasis <sup>1</sup>. Furthermore, given the localization of the majority of disease-relevant  
78 genomic variations in non-coding regulatory regions <sup>1</sup>, their involvement in disease  
79 pathogenesis is well documented. Accordingly, tremendous effort is deployed to annotate  
80 these regulatory elements in different species, tissues and cells <sup>2-4</sup>. To this end, different  
81 experimental protocols and computational algorithms have been applied to identify genome-  
82 wide regulatory elements responsible for controlling gene expression <sup>5</sup>. These include  
83 techniques such as ChIP-seq, ATAC-seq, DNase-seq, Hi-C, and functional genomics using  
84 CRISPR activation or inhibition studies etc., each with their strengths and limitations<sup>5,6</sup>. In  
85 addition, computational methods such the Activity by Contact (ABC) algorithm<sup>3</sup>, TargetFinder,  
86 ELMER and others have been developed to integrate these datasets and identify gene-  
87 enhancer pairs. Similarly, large consortiums have been formed to annotate these regulatory  
88 elements in different tissues <sup>7,8</sup>. These studies provide a readily accessible resource and  
89 reference catalogue of the non-coding regulatory elements to the scientific community and  
90 help scientists unravel the role of regulatory regions in disease development and evaluate  
91 potential therapeutic strategies <sup>9-11</sup>.

92

93 Besides the direct identification of enhancer-gene (E-G) pairs, other studies have  
94 demonstrated that enhancers and promoters often interact dynamically within a network  
95 often called cis-regulatory hubs (CRH), allowing for multiple regulatory connections <sup>12,13</sup>.  
96 These CRHs can be defined as 3D regulatory networks that constitute a complex organization  
97 of multi-loci connections of enhancers and promoters, connected in 3D space within the  
98 nucleus. They highlight direct and indirect contact between genes and distal regulatory  
99 elements and can help predict target genes for disease-relevant non-coding SNPs<sup>13</sup>. They are  
100 often bound by a cluster of transcription factors and have been implicated in gene co-  
101 regulation, lineage specification and disease development <sup>12-14</sup>. These hubs differ from other  
102 known 3D structures such as genomic compartments which constitute euchromatin or

103 heterochromatin regions. They also differ from TADs defined as units within which most  
104 enhancer-promoter interactions occur and loops which are pair-wise connections<sup>15</sup>.  
105 Identification of these CRHs is often done through detailed analysis of 3D contacts based on  
106 Hi-C data or using chromatin accessibility (ATAC or DNase) to study co-accessible regions and  
107 thus construct these hubs<sup>12,16-19</sup>. A recent study proposed building these CRHs as a bipartite  
108 network using the Activity-by contact (ABC) algorithm<sup>13</sup>. The ABC algorithm combines ATAC-  
109 seq, ChiP-seq and Hi-C to rank the gene enhancers based on their regulatory impact and was  
110 shown to outperform other models such as HiChIP or TargetFinder in identifying regulatory  
111 enhancers<sup>3,20</sup>. Thus in addition to identifying and ranking enhancers, the ABC algorithm is  
112 used to generate a more predictive and physiologically relevant CRH<sup>13</sup>, and these hubs were  
113 strongly enriched for disease-relevant genes and also helped explain disease heritability<sup>13,21</sup>.

114  
115 Given that the 3D genome architecture is a key component of the ABC algorithm, which is  
116 used to construct the CRHs,<sup>13</sup> it is of huge importance to understand the role of architectural  
117 proteins like CTCF. The CTCF protein often called the “genome weaver” plays a crucial  
118 function in the “folding” of the genome and bringing of enhancers into proximity to their  
119 distant target genes<sup>15,22</sup>. However, their role in regulating CRHs have not been explored. In  
120 this study, using mouse cardiomyocytes as a model of terminally differentiated non-dividing  
121 cells, we employ the ABC model to identify top cardiac gene-enhancers and then to study  
122 CRHs. We analyse the characteristics of CRHs containing tissue-specific genes, showing that  
123 these genes are enriched in multi-enhancer CRHs. We also show that in disease, there is a  
124 positive regulation of genes and enhancers within a CRH. Finally we show that loss of CTCF  
125 leads to a merging of CRHs and formation of new CRHs in the *Ctcf*-KO cells with resultant  
126 drastic change in the number and distribution of enhancers that cross the ABC threshold.

127

## 128 **RESULTS**

129

### 130 *Cardiac Enhancer Landscape Identified Through Activity-By-Contact Algorithm*

131

132 We performed ATAC-seq, H3K27ac ChiP-seq and HiChIP, to generate the ABC scores for the  
133 enhancer-gene pairs in the control adult mouse cardiomyocytes. Using an ABC cut-off of 0.01  
134<sup>13</sup>, we identified 7000 out of 156,988 putative distal regulatory regions marked by H3K27ac

135 peaks and/or ATAC peak in the adult mouse CM that crossed the threshold. This represents  
136 about 5% of all putative regulatory regions predicted to have regulatory effect on their target  
137 genes and is similar to what was observed in another study<sup>3</sup>. With regards to the enhancer-  
138 gene (E-G) pairs, globally there were 34,496 E-G interactions with an average of 4.19  
139 connections per gene, and 5.29 connections per enhancer in these control adult mouse CMs.  
140 Figure 1A shows examples of top-linked enhancers and their target genes for 2 cardiac  
141 disease-relevant genes *Mybpc3* and *Myh6*. The comprehensive list of ABC linked enhancers  
142 and target genes can be found in Supplementary Table 1. A literature search confirmed that  
143 at least 3 of the identified enhancers in our study have been validated. These include the  
144 *Nppa/Nppb* super enhancer located upstream of both genes and which has been shown to  
145 play a critical role in stress gene response of *Nppa/Nppb* during pressure-overload induced  
146 cardiac stress<sup>23-25</sup>. A separate enhancer for *Myh7* identified from the ABC scoring has also  
147 been validated previously in the mouse heart<sup>26</sup>. Deletion of this enhancer region led to  
148 downregulation of *Myh7* in mouse hearts<sup>26</sup>. Taken together, these previous studies provide  
149 support to the validity of our prediction model.

150 To provide further evidence that these ABC-linked enhancers regulate their putative target  
151 genes, we studied correlation between changes in gene expression versus changes in peak  
152 height of the ABC-linked enhancers during pressure overload-induced cardiac hypertrophy.  
153 Using RNA-seq and H3K27ac ChIP-seq datasets from mouse hearts subjected to transverse  
154 aortic constriction<sup>23</sup>, we found that changes in gene expression correlates modestly with  
155 changes in H3K27ac peak signals (Pearson correlation= 0.34,  $P < 2.2e-16$ ) (Fig 1B). The  
156 correlation was stronger when focussing only on genes and enhancers with greater or less  
157 than  $\log_2$  0.5 fold change after Transverse aortic constriction (Suppl Fig 1A) (Pearson  
158 correlation = 0.51,  $P < 2.2e-16$ ). This result shows that globally, upon external stimuli, gene  
159 expression is regulated in the same direction as their ABC linked enhancers.

160

### 161 Loss Of CTCF Leads To Changes In The Enhancer Interactome And Changes In The ABC Scores 162 Of Putative Enhancers

163

164 Next, to elucidate the role of CTCF in ABC scores and regulation of the CRHs, we also applied  
165 the ABC algorithm to the *Ctcf*-Knock out (*Ctcf*-KO) mouse cardiomyocytes. Given that previous  
166 publications have shown that the overall number of regulatory regions identified through

167   ChIP-seq or ATAC-seq after CTCF deletion remain mostly unchanged <sup>27,28</sup>, with changes only  
168   observed in the peak heights, we focussed our attention on the HiChIP differences. We have  
169   previously published a genome-wide Hi-C in mouse cardiomyocytes <sup>23</sup>. A deeper analysis of  
170   the H3K27ac interactions through the first Micro-C/MNase mediated H3K27ac HiChIP in  
171   mouse CMs unravelled the enhancer interactome in the mouse heart. HiChIP presents  
172   advantages over Hi-C by providing better resolution with equal or lower sequencing depth <sup>29</sup>  
173   while the use of MNase in Micro-C provides better resolution for enhancer-promoter  
174   interactions compared to restriction-enzyme digest methods <sup>30</sup>. The H3K27ac HiChIP  
175   experiment was performed on two independent biological replicates each, and the data were  
176   merged to give a total of 160 million unique pairs for the *Ctcf*-KO and 126 million unique pairs  
177   for the control samples sufficient for HiChIP analysis<sup>29</sup>. For comparative analysis, the *Ctcf*-KO  
178   data was down sampled to 126M to match the control data. Using a window size of 10kb and  
179   an FDR of <0.1, we performed FitHiChIP <sup>31</sup> to identify the significant H3K27ac-anchored loops  
180   in our dataset. The results revealed 12,843 H3K27ac loops unique to control cells, 7,070  
181   H3K27ac loops unique to *Ctcf*-KO cells and 483 shared H3K27ac loops between both  
182   conditions (Figure 2A, Supplementary Table 2). The KO-unique H3K27ac loops spanned longer  
183   distances than control-unique and shared H3K27ac loops (Figure 2B), consistent with previous  
184   studies using H3K4me3 HiChIP in zebrafish <sup>27</sup>. We further analysed these H3K27ac interaction  
185   anchors for the presence of CTCF using the Control CTCF ChIP-seq as reference. We  
186   discovered that 14% of these H3K27ac loop anchors occurred in regions with CTCF binding at  
187   both anchors in the control-unique group, while only 4.2% of the H3K27ac loops in the *Ctcf*-  
188   KO occurred in anchors with native CTCF binding. Concordantly, 56% of the H3K27ac loops  
189   had no native CTCF binding at the anchors in control, with the number increasing to 65% in  
190   the KO samples. The percentage of H3K27ac loops with native CTCF binding at one anchor  
191   was consistent at about 30% for both control and *Ctcf*-KO (Fig 2C). This shows that the loss of  
192   CTCF led to a 70% decrease in the H3K27ac loops that co-localize with CTCF at both anchors  
193   in the *Ctcf*-KO cells, with an increase in ectopic interactions between H3K27ac anchors  
194   without CTCF. Next we performed the aggregate peak analysis (APA) for the control and *Ctcf*-  
195   KO samples, the APA reveals enrichment for loop domains often bound by CTCF and Cohesin  
196   at the anchors <sup>15</sup>. Consistent with our previously published Hi-C data, and other studies that  
197   have performed aggregate analysis in different *Ctcf*-KO models <sup>32</sup>, there was a marked  
198   decrease in the APA score from 3.33 in the control to 0.86 in the *Ctcf*-KO for all H3K27ac loops,

199 suggesting indeed the loss or weakening of loop domains in the *Ctcf*-KO samples <sup>23</sup>. The APA  
200 score was also higher for the control unique and shared loops in the control samples, while  
201 the APA score for *Ctcf*-KO unique group was higher in the *Ctcf*-KO samples as anticipated,  
202 possible representing some re-arrangement of Cohesin in the *Ctcf*-KO group (Figure 2D)

203  
204 We applied the ABC algorithm on the *Ctcf*-KO sample and observed that there were 36,226  
205 regulatory elements that crossed the 0.01 threshold, resulting in 71,080 E-G interactions with  
206 similar number of expressed genes (~8,000) (Supplementary Table 1) in control and *Ctcf*-KO  
207 samples. This led to an increase in the average number of connections per gene to 8.14 in  
208 *Ctcf*-KO samples. Of the 71,080 enhancer-gene pairs only 20% (14,200 E-G pairs) were shared  
209 between control and *Ctcf*-KO. This increase in ABC scores could be due to increased  
210 interaction frequency and/or increased H3K27ac ChIP-seq upon CTCF loss. Interestingly we  
211 observed that the highest ranked ABC enhancer in the control had a score of 0.99, while the  
212 highest ranked enhancer in the *Ctcf*-KO sample had a score of 0.78 (scale of 0 – 1). Indeed the  
213 average score in the control was 0.054 while the average score in the *Ctcf*-KO was 0.028 (TTest  
214 P-value < 2.2e-16). This suggests that the loss of CTCF led to gain of ectopic enhancers in the  
215 *Ctcf*-KO with a redistribution of the ABC scores of the enhancers.

216 Next we integrated the ABC results to generate the CRHs focussing first on the control  
217 samples. We identified 1,522 hubs in these control cardiomyocytes with about 70% of the  
218 hubs containing fewer than 5 elements (Fig 3A). Figure 3B shows 2 examples of such hubs  
219 containing cardiac genes: *Myom1* a gene involved in formation of myofibrils <sup>33</sup>, and found in  
220 a simple hub while *Tnni3* a cardiac-specific sarcomeric gene is found in a more complex hub.  
221 Consistent with the correlation between gene expression and ABC-linked enhancers in heart  
222 disease, we also verified that genes and enhancers within the same hubs are positively  
223 correlated in same direction of change during cardiac stress, showing Pearson correlation of  
224 0.32 (P < 2.2e-16) (Figure 3C). This suggests a co-regulation of genes and enhancers found  
225 within the same hub upon external stimuli. We then ranked cardiac genes by FPKM and  
226 selected the top 50 genes, mostly cardiac-specific genes, to glean biological insights about the  
227 characteristics of CRHs that harbour these highly expressed genes. Our data revealed that  
228 highly expressed cardiac genes were more likely to be in hubs with more regulatory elements  
229 than non-highly expressed genes (Figure 3D). These cardiac-specific genes were also more  
230 likely to be found in hubs with higher number of promoters. Such multi-enhancer hubs has



231 been proposed as a mechanism to buffer against environmental stresses and genetic  
232 perturbations and thus provide phenotypic robustness to key genes<sup>21,34</sup>. On the other hand,  
233 hubs with high number of promoters are characteristic of lineage specific genes<sup>13,21</sup>.

234

### 235 Loss Of CTCF Alters The Cis-Regulatory Hubs

236

237 Finally, we analysed the CRHs in the *Ctcf*-KO CMs and found a marked reduction in total  
238 number of CRHs from 1522 in control to 660 CRHs in the KO, accompanied with an increase  
239 in the number of elements per hub. Fig 4A shows example of the same hubs containing 2  
240 cardiac genes shown in Fig 3A. Describe observation., Figure 4B shows the distribution of  
241 elements per hub, confirming a striking increase in the percentage of hubs with 10 or more  
242 elements. Associated with this increase in percentage of complex hubs, there was an increase  
243 in the average number of connections per gene in the *Ctcf*-KO cells, and a decrease in number  
244 of connections per enhancer (Fig 4C, Supplementary Fig 1B). We asked if this reduction in  
245 total number of CRHs was merely due to merging of CRHs or formation of new CRHs, and  
246 observed both cases. The merging of CRHs was observed primarily in the simple hubs (2-3  
247 elements per hub) located within close proximity as 403 (82%) of 492 such simple hubs  
248 merged with 1 or more other hubs to form larger hubs. The proportion of the number of CRHs  
249 merging to form a new one varied, ranging from 2 merged CRHs to 15 merged CRHs  
250 Supplementary Fig 1C. For the larger hubs, there was mostly formation of new hubs, as genes  
251 gained new interaction and lost other interactions. To further confirm the importance of CTCF  
252 in the organization of these hubs, we compared CTCF binding sites in the control hubs vs *Ctcf*-  
253 KO hubs based on control CTCF ChIP-seq, and observed an enrichment of CTCF in the control  
254 hubs (fisher exact test odds ratio of 1.69, two sided  $P < 2e-16$ ). Next, we analyzed the  
255 relationship between CRHs and TADs since TAD boundaries are enriched for CTCF<sup>23</sup>, and  
256 earlier studies have shown that CRHs are generally constrained within TAD boundaries<sup>13</sup>.  
257 Indeed, using the TADs in the control as reference, our data showed that about 80% of CRHs  
258 in the control were contained within the same TAD while only 20% spanned more than 1 TAD.  
259 In contrast, about 45% of CRHs in KO were contained within a TAD while 50% of CRHs in the  
260 KO spanned more than 1 TAD (Fig 4D) while 5% were not within TAD boundaries, showing  
261 that the loss of CTCF leads to a reorganization of the CRHs with the formation of cross-TAD  
262 enhancer-promoter interactions.



263

## 264 **DISCUSSION**

265

266 Non-coding regulatory elements play crucial roles in development and disease and hold  
267 promise for next-generation therapeutic targets. While different studies by us and others  
268 have annotated these elements and CRHs in different cellular models, the role of CTCF in the  
269 ABC derived CRHs was yet to be studied. First, our study applied the ABC algorithm to the  
270 mouse heart, generating to the best of our knowledge, the first such ranked enhancer scores  
271 in mice hearts. Our findings confirm the positive correlation between genes and their ABC-  
272 linked enhancers in cardiac disease, and affirms that genes and enhancers within the same  
273 hub are co-regulated during pressure overload-induced cardiac hypertrophy. Integrating ABC  
274 to identify CRHs may thus represents another method to analyze for effect of regulatory SNPs  
275 on target genes, as the SNP may have effect on a target gene when they are in the same hub,  
276 even when there is no direct link through pair-wise enhancer-promoter analysis<sup>13</sup>. Analysis  
277 of the CRHs also suggests that tissue-specific genes are more likely to be contained in hubs  
278 with high connectivity and rich in distal elements. This increased number of E-P networks  
279 provides redundancy and phenotypic robustness while guaranteeing increased  
280 transcriptional activity thanks to the multi-enhancer networks.

281

282 Loss of CTCF affects the enhancer interactome, particularly impacting the H3K27ac  
283 interactions co-bound by CTCF. This leads to E-Ps that span larger distances and gain of new  
284 interactions. The loss of CTCF also leads to a re-organization of ABC-selected enhancers with  
285 a direct impact on the CRHs, resulting in fewer hubs but with more elements per hub. This  
286 implies a crucial role for CTCF in not only determining which enhancers cross the ABC  
287 threshold but also in the organization of the ABC-derived CRH. While this study focussed on  
288 the effect of loss of CTCF on overall CRH structure and its relationship with TAD boundaries,  
289 future studies will examine individual CRHs and their relationship to CTCF binding to ascertain  
290 how loss of CTCF can lead to local dysregulation of CRHs. Indeed, this finding has implications  
291 for mutations that affect local CTCF binding at regions that are not TAD boundaries, as it may  
292 lead to merging of 2 or more CRHs and thus the establishment of indirect connection between  
293 genes and enhancers within the newly formed hubs.

294

295 Our findings therefore demonstrate that CTCF plays a critical role in determining the  
296 membership of the CRHs as well as their organization, and thus plays a role in disease and cell  
297 type-specific gene expression through organization of these cis-regulatory hubs.

298

## 299 **ABBREVIATIONS**

300 ChIP-seq – Chromatin immunoprecipitation with sequencing

301 ATAC-seq – Assay for Transposase Accessible Chromatin with sequencing

302 Hi-C – High throughput chromatin conformation capture with sequencing

303 ABC – Activity by contact algorithm

304

## 305 **DECLARATIONS**

306 **ETHICS APPROVAL:** Animal protocol approved by the Institutional Animal Care and Use  
307 Committee (National University of Singapore)

308 **CONSENT FOR PUBLICATION** – The authors consent to publication of this article

## 309 **AVAILABILITY OF DATA AND MATERIALS**

310 The raw data supporting the conclusion of this article will be made available by the authors,  
311 without undue reservation.

## 312 **COMPETING INTEREST**

313 Cory C. Padilla works for Cantata Bio, developers of the HiChIP kit used in the study. The other  
314 authors declare that the research was conducted in the absence of any commercial or  
315 financial relationships that could be construed as a potential conflict of interest

## 316 **FUNDING**

317 This work was supported by grants from the National Medical Research Council (to Dr Foo),  
318 Start-up grants from the Montreal Heart Institute (Dr. Anene-Nzelu). The funding was used  
319 to purchase the reagents. Some data analyses were performed on computing resources  
320 from Compute Canada.

## 321 **AUTHOR CONTRIBUTION**

322 M.L, D.P.L, W.Z, L.G, C.C.K, Y.L, R.W, C.G.A.N performed the experiments, M.L, L.M, C.P, W.T,  
323 S.B, A.B, C.G.A.N provided data analysis. S.B, A.B, R.F, C.G.A.N Provided supervision for  
324 experiments and data analysis. All authors read and approved the manuscript

## 325 **ACKNOWLEDGEMENTS**

326 We thank Cantata Bio for providing the HiChIP kits

## 327 **METHODS**

328

### 329 *Animal Experiments*

330 Animal experiments were performed under a license approved by the Institutional Animal  
331 Care and Use Committee (National University of Singapore). *Ctcf*<sup>flox/flox</sup> mice harboring LoxP  
332 sites flanking exons 3 and 12 of the *Ctcf* gene against a C57/bl6 strain background were used  
333 as previously published<sup>23</sup>. Details of the source of the original strain has been documented  
334 in our earlier publication<sup>23</sup>. AAV9-cTnt-eGFP and AAV9-cTnt-Cre-tdTomato vectors encoding  
335 codon improved Cre recombinase or eGFP under the control of cardiac troponin T promoter  
336 were used for control and *Ctcf* knock-out respectively<sup>23</sup>. Experiments were performed on  
337 adult 6- to 8-week-old mice. 3 mice were used for each group, housed in 2 different cages.  
338 The numbers were based on our previously published study<sup>23</sup>. Cardiomyocytes were  
339 isolated from mouse hearts after 2 weeks of AAV9 injections for control and *Ctcf*-KO mice.  
340 CTCF knock-out was assessed by western blot, and upon confirmation, cells were used for  
341 subsequent experiments. Adeno-associated virus 9 (AAV9) virus for the delivery of Cre  
342 recombinase was generated as previously described<sup>23</sup>. For cardiomyocyte isolation,  
343 isoflurane anaesthesia is used before performing a thoracotomy to harvest the hearts as  
344 previously described<sup>23</sup>.

345

### 346 *H3k27ac HiChIP Library Prep And Data Analysis.*

347 Mouse adult cardiomyocytes were isolated following previously published protocol<sup>23</sup>.  
348 MNase-based HiChIP assay was performed on 2x10<sup>6</sup> isolated CMs. Frozen cells were  
349 resuspended in 1x PBS and crosslinked with 3 mM DSG and 1% formaldehyde. Washed cells  
350 were digested with 0.75 µl MNase in 100 µl of nuclease digest buffer with MgCl<sub>2</sub>. Cells were  
351 lysed with 1x RIPA, and clarified lysate was used for ChIP. H3K27ac antibody (Abcam 04729)  
352 was used to perform chromatin immunoprecipitation. The Protein A/G bead pulldown,  
353 proximity ligation, and libraries were prepared as described in the Dovetail protocol (Dovetail  
354 HiChIP MNase Kit). Libraries were sequenced on an Illumina Novaseq.

355

356 HiChIP paired-end reads were aligned with BWA MEM (version 0.7.17r1198-dirty) with the -  
357 5SP flag enabled with an index containing only the canonical chromosomes of the mm10  
358 genome (available from the UCSC genome). The resulting alignments were then parsed with

359 pairtools (versions 0.3.0) with the following options --min-mapq 40 --walks-policy 5unque --  
360 max-inter-align gap 30 and the thre --chroms-path file corresponding to the size of the  
361 chromosomes used for the alignment index. Parse pairs were deduplicated, sorted with  
362 pairtools. Valid pairs were identified and through pairtools select (pair type = 'UU', 'UR', 'RU',  
363 'uu', 'uU' and 'Uu') and downsampled to the lowest number of valid pairs in a sample (126  
364 million in LACZ) with pairtools sample. Contact matrices in .hic format were generated with  
365 juicetools pre function (version 1.22.01).

366

367 FitHiChIP (version 9.1) was used to identify significant interactions ("loops") from the valid  
368 subsampled pairs at 10kb resolution with the following settings, loop type = all-to-all,  
369 coverage = bias correction, merge redundant loops = Yes, background model = FithHiChIP(L),  
370 FDR < 0.1, minimum interaction size =20kb, maximum interaction size = 2 mb. Conditionally  
371 unique (meaning only occurring in LACZ or CRE) and shared loops were identified with  
372 bedtools pairToPair (version 2.28.0) requiring both loop anchors to overlap the same  
373 coordinates be flagged as shared. Loop size was assessed by performing a two-sided  
374 Wilcoxon's rank-sum test on the distribution of loop ranges (distance between the two  
375 anchors). Loop anchors were then intersected the LACZ CTCF binding sites to determine the  
376 proportion of loops resulting from CTCF presence. P-values for CTCF mediated loops were  
377 obtained through a two-sided Fischer's Exact test. Aggregate Peak Analysis (APA) was  
378 computed with juicetools APA function. Loop anchors were used to as the sites to aggregate  
379 over at 10kb resolution. APA enrichment scores, loop center from the lower-left (LL) corner is  
380 shown as both an APA score (ratio of the mean of center to mean of LL) and a Z-score. APA  
381 normed output was used to plot the APA matrices.

382

383 H3K27ac HiChIP data were summarized and visualized with R, the package eulurr was used  
384 for the shared and unique loop Venn diagrams and ggplot2 for loop size and proportion of  
385 loops with CTCF binding site at the anchor. Additionally, ggplot2 was used to plot APA  
386 matrices with the geom\_raster function, with the color scale set to the same min – max limits  
387 across all APA plots. At sites of interest, HiChIP loops files (in longrange format) were used to  
388 visualize loops along with ChIP-seq coverage and RNA-seq activity in the WashU Epigenome  
389 Browser (<https://epigenomegateway.wustl.edu/>).

390

### 391 Chip-Seq Experiment And Data Analysis

392

393 ChIP experiments on isolated CM were performed as described previously<sup>23</sup>. Briefly, CMs  
394 were cross-linked with 1% formaldehyde for 10 minutes at room temperature and quenched  
395 with glycine (0.125 mol/L final concentration). Cells were then washed in ice-cold PBS and  
396 pelleted and lysed in FA lysis buffer (10 mmol/L Tris-HCl, pH 8.0, 0.25% Triton X-100, 10  
397 mmol/L EDTA, 0.1 mol/L NaCl). To facilitate cell lysis, the cell pellet was passed through a 27.5-  
398 gauge needle gently 20 times. Nuclei were pelleted by centrifugation resuspended in  
399 sonication buffer, and chromatin was fragmented via sonication to an average size of 200 to  
400 300 bp (Bioruptor Plus, Diagenode). Chromatin was immunoprecipitated against H3K27ac  
401 (Abcam ab4729) or CTCF (EMD Millipore, catalog No. 07–729) overnight. Antibody-chromatin  
402 complexes were pulled down with Protein G Dynabeads (Invitrogen, catalog No. 10003D),  
403 washed with 0.1% SDS lysis buffer, and eluted with elution buffer (1% SDS, 10 mmol/L EDTA,  
404 50 mmol/L Tris-HCl, pH 8). After cross-link reversal (4 hours of incubation at 65°C) and  
405 proteinase K treatment, immunoprecipitated DNA was extracted. ChIP DNA was quantified  
406 by fluorometric quantification (Thermo Fisher Scientific, Qubit dsDNA HS assay kit, catalog  
407 No. 32851). Library preparation was performed with the New England Biolabs Ultra II Kit  
408 according to the manufacturer's specifications and sequenced on the Illumina NextSeq High  
409 platform.

410

411 Paired-end reads were aligned to the mm10 genome using Bowtie2. The uniquely aligned  
412 reads were PCR-duplicate removed. Peak-calling was performed using Dfilter, and  
413 parameters were optimized for different antibodies. For H3K27ac, the parameters are: ks=60,  
414 lpval=6. For CTCF, ks=10, lpval=6, -nonzero, -refine. Reads were counted in 100-bp windows  
415 for each library and scaled to normalize for sequencing depth. Read counts in each window  
416 were then adjusted by normalizing their GCcontent against the average GC-content of all  
417 libraries. Peak height was obtained by summing the bin-wise normalized counts. Peak height  
418 was quantile-normalized to reduce technical variation. Supplementary Table 3 lists H3K27ac  
419 peaks in Sham and TAC treated mouse cardiomyocytes.

### 420 ATAC-Seq Experiment And Analysis

421

422 The ATAC-seq was performed according to previously published Omni-ATAC protocol <sup>35</sup>  
423 Briefly, 50,000 adult cardiomyocytes were pelleted at 500 g for 5 minutes. The cells were  
424 resuspended in 100 µl ATAC-resuspension buffer containing 0.5% NP40, 0.5 % Tween-20 and  
425 0.01% Digitonin. The cells were left on ice for 5 minutes after which 1 ml of cold ATAC-RSB  
426 containing 0.1% Tween 20 was added to wash out the lysis buffer. The nuclei were pelleted  
427 at 500 g for 5 minutes, the supernatant was carefully removed and the nuclei were  
428 resuspended in 50 µl transposition mixture containing 25 µl of 2x TD buffer, 16.5 µl of PBS, 5  
429 µl nuclease free water, 0.5 µl of 1% digitonin, 0.5 µl of 10% Tween-20 and 2.5 µl of transposase  
430 (Illumina Tagment DNA enzyme 1, Catalogue number 20034198). The reaction was incubated  
431 at 37°C for 30 minutes in a thermoshaker with 1000 RPM. After the reaction, DNA was  
432 extracted using the NEB Monarch® PCR & DNA cleanup kit (Catalogue number T1030L), PCR  
433 was performed using the Illumina/Nextera primers after which Ampure XP beads were used  
434 for library clean up. The resulting library was sequenced on Nextseq. Note that while ChIP-  
435 seq and HiChIP were performed on control and CTCF-KO cells, the ATAC-seq experiments  
436 were performed on a wild type C57/bl6 strain mice. ATACseq peaks were called on each  
437 sample using MACS2 (callpeak function with these parameters: -nomodel and -B). BedGraph  
438 files generated by MACS2 were normalized to read counts per million reads sequenced

439

#### 440 ABC-Score And CRH Analysis

441

442 The ABC model defines active enhancers based on a quantitative score of DNase, H3K27ac,  
443 and normalized Hi-C contact number<sup>3</sup>. This score is computed relative to a background activity  
444 over a 5-Mb window around a candidate element. Then, we set the threshold to 0.01; beyond  
445 which a candidate element is considered as a distal element. As an extension of the ABC-  
446 Score, CRHs were defined as bipartite networks between promoters and distal elements  
447 (igraph R package) <sup>36</sup> TADs were called using the directionality index as previously described.  
448 Pearson correlation analysis performed using R package

449

450 Figure 1:

451 A) USCS screenshot showing 2 examples of cardiac genes and their top ABC-linked  
452 enhancers

453 B) Pearson analysis showing correlation between differential expressed genes and  
454 differential enhancer peaks for ABC-linked enhancers during cardiac disease

455

456 Figure 2: H3K27ac HiChIP in Control and CTCF KO

457 A) Venn diagram showing number of FitHiChIP interactions in Control-unique and *Ctcf*-  
458 KO unique and shared loops

459 B) Box plot showing the loop sizes in the various groups. The loops in CTCF-unique  
460 interactions span longer distance than the interactions in Control unique CM

461 C) Bar chart showing distribution of CTCF at the FitHiChIP anchors. 14% of the loops have  
462 CTCF at both anchors in the control while only 4.2% of loops in the CTCF KO have CTCF  
463 on both anchors using the Control CTCF binding as reference

464 D) Aggregate Peak Analysis for the loops in Control and CTCF KO cells, showing a marked  
465 reduction of the APA and Z-score in the CTCF KO samples for all loops

466

467 Figure 3: CRH in control Cardiomyocytes

468 A) Bar chart showing distribution of number of elements per CRH

469 B) Examples of 2 CRHs containing cardiac genes *Myom1* and *Tnni3* in the control  
470 cardiomyocytes

471 C) Pearson correlation between differential expression of genes and enhancer peaks  
472 contained within the same CRHs during cardiac stress

473 D) Box plot showing characteristics of CRHs containing cardiac specific genes. These CRHs  
474 tend to have more enhancers and promoters

475

476 Figure 4: CRHs in the KO cells

477 A) Examples of 2 CRHs containing cardiac genes *Myom1* and *Tnni3* in the *Ctcf*-KO  
478 cardiomyocytes. Compared to the same CRHs in control, there is an increase in the  
479 number of elements in each hub

480 B) Bar chart showing distribution of elements per CRH in Control and *Ctcf*-KO. There is  
481 an increase in the percentage of CRHs with 10 or more elements from 15% in the  
482 Control to 60% in the CTCF KO cardiomyocytes



- 483 C) Bar chart showing number of connections per gene promoters and per enhancers.  
484 There is an increase in the average number of connections per gene in the *Ctcf*-KO  
485 CMs  
486 D) Bar chart showing overlap of CRHs with TADs, 80% of TADs are contained in one TAD  
487 in the control while only 40% of CRHs are contained within one TAD in the CTCF KO.  
488 In contrast 20% of CRHs span 2 or more TADs in the control, while 50% of CRHs span  
489 2 or more TADs in CTCF KO.

490

491 Supplementary figure 1

- 492 A) Pearson analysis showing correlation between differential expressed genes and  
493 differential enhancer peaks for ABC-linked enhancers during cardiac disease when  
494 taking into account only genes and enhancers with a fold change of log<sub>2</sub> 0.5  
495 B) Bar chart showing number of connections per gene promoters and per enhancers in  
496 control and *Ctcf*-KO cells  
497 C) Bar chart showing how many CRHs were merged to form a bigger CRH in *Ctcf*-KO cells,  
498 and the percentage of each category

499

500

501

502

- 503 1 Maurano, M. T. *et al.* Systematic localization of common disease-associated variation  
504 in regulatory DNA. *Science* **337**, 1190-1195, doi:10.1126/science.1222794 (2012).  
505 2 Boix, C. A., James, B. T., Park, Y. P., Meuleman, W. & Kellis, M. Regulatory genomic  
506 circuitry of human disease loci by integrative epigenomics. *Nature* **590**, 300-307,  
507 doi:10.1038/s41586-020-03145-z (2021).  
508 3 Fulco, C. P. *et al.* Activity-by-contact model of enhancer-promoter regulation from  
509 thousands of CRISPR perturbations. *Nat Genet* **51**, 1664-1669, doi:10.1038/s41588-  
510 019-0538-0 (2019).  
511 4 Yao, L. *et al.* A comparison of experimental assays and analytical methods for genome-  
512 wide identification of active enhancers. *Nat Biotechnol*, doi:10.1038/s41587-022-  
513 01211-7 (2022).  
514 5 Gasperini, M., Tome, J. M. & Shendure, J. Towards a comprehensive catalogue of  
515 validated and target-linked human enhancers. *Nat Rev Genet* **21**, 292-310,  
516 doi:10.1038/s41576-019-0209-0 (2020).  
517 6 Anene-Nzelu, C. G., Lee, M. C. J., Tan, W. L. W., Dashi, A. & Foo, R. S. Y. Genomic  
518 enhancers in cardiac development and disease. *Nat Rev Cardiol*, doi:10.1038/s41569-  
519 021-00597-2 (2021).

- 520 7 Consortium, E. P. *et al.* Expanded encyclopaedias of DNA elements in the human and  
521 mouse genomes. *Nature* **583**, 699-710, doi:10.1038/s41586-020-2493-4 (2020).
- 522 8 Roadmap Epigenomics, C. *et al.* Integrative analysis of 111 reference human  
523 epigenomes. *Nature* **518**, 317-330, doi:10.1038/nature14248 (2015).
- 524 9 Alexanian, M. *et al.* A transcriptional switch governs fibroblast activation in heart  
525 disease. *Nature* **595**, 438-443, doi:10.1038/s41586-021-03674-1 (2021).
- 526 10 Frangoul, H. *et al.* CRISPR-Cas9 Gene Editing for Sickle Cell Disease and beta-  
527 Thalassemia. *N Engl J Med* **384**, 252-260, doi:10.1056/NEJMoa2031054 (2021).
- 528 11 Matharu, N. *et al.* CRISPR-mediated activation of a promoter or enhancer rescues  
529 obesity caused by haploinsufficiency. *Science* **363**, doi:10.1126/science.aau0629  
530 (2019).
- 531 12 Espinola, S. M. *et al.* Cis-regulatory chromatin loops arise before TADs and gene  
532 activation, and are independent of cell fate during early *Drosophila* development. *Nat*  
533 *Genet* **53**, 477-486, doi:10.1038/s41588-021-00816-z (2021).
- 534 13 Mangnier, L., Joly-Beauparlant, C., Droit, A., Bilodeau, S. & Bureau, A. Cis-regulatory  
535 hubs: a new 3D model of complex disease genetics with an application to  
536 schizophrenia. *Life Sci Alliance* **5**, doi:10.26508/lsa.202101156 (2022).
- 537 14 Di Giammartino, D. C., Polyzos, A. & Apostolou, E. Transcription factors: building hubs  
538 in the 3D space. *Cell Cycle* **19**, 2395-2410, doi:10.1080/15384101.2020.1805238  
539 (2020).
- 540 15 Rao, S. S. *et al.* A 3D map of the human genome at kilobase resolution reveals  
541 principles of chromatin looping. *Cell* **159**, 1665-1680, doi:10.1016/j.cell.2014.11.021  
542 (2014).
- 543 16 Li, T., Jia, L., Cao, Y., Chen, Q. & Li, C. OCEAN-C: mapping hubs of open chromatin  
544 interactions across the genome reveals gene regulatory networks. *Genome Biol* **19**,  
545 54, doi:10.1186/s13059-018-1430-4 (2018).
- 546 17 Madsen, J. G. S. *et al.* Highly interconnected enhancer communities control lineage-  
547 determining genes in human mesenchymal stem cells. *Nat Genet* **52**, 1227-1238,  
548 doi:10.1038/s41588-020-0709-z (2020).
- 549 18 Oudelaar, A. M. *et al.* A revised model for promoter competition based on multi-way  
550 chromatin interactions at the alpha-globin locus. *Nat Commun* **10**, 5412,  
551 doi:10.1038/s41467-019-13404-x (2019).
- 552 19 Pliner, H. A. *et al.* Cicero Predicts cis-Regulatory DNA Interactions from Single-Cell  
553 Chromatin Accessibility Data. *Mol Cell* **71**, 858-871 e858,  
554 doi:10.1016/j.molcel.2018.06.044 (2018).
- 555 20 Anene-Nzelu, C. G. *et al.* Assigning Distal Genomic Enhancers to Cardiac Disease-  
556 Causing Genes. *Circulation* **142**, 910-912, doi:10.1161/CIRCULATIONAHA.120.046040  
557 (2020).
- 558 21 Tsai, A., Alves, M. R. & Crocker, J. Multi-enhancer transcriptional hubs confer  
559 phenotypic robustness. *Elife* **8**, doi:10.7554/eLife.45325 (2019).
- 560 22 Ong, C. T. & Corces, V. G. Enhancer function: new insights into the regulation of tissue-  
561 specific gene expression. *Nat Rev Genet* **12**, 283-293, doi:10.1038/nrg2957 (2011).
- 562 23 Lee, D. P. *et al.* Robust CTCF-Based Chromatin Architecture Underpins Epigenetic  
563 Changes in the Heart Failure Stress-Genes Response. *Circulation* **139**, 1937-1956,  
564 doi:10.1161/CIRCULATIONAHA.118.036726 (2019).

- 565 24 Man, J. C. K. *et al.* Genetic Dissection of a Super Enhancer Controlling the Nppa-Nppb  
566 Cluster in the Heart. *Circ Res* **128**, 115-129, doi:10.1161/CIRCRESAHA.120.317045  
567 (2021).
- 568 25 Sergeeva, I. A. *et al.* Identification of a regulatory domain controlling the Nppa-Nppb  
569 gene cluster during heart development and stress. *Development* **143**, 2135-2146,  
570 doi:10.1242/dev.132019 (2016).
- 571 26 Dickel, D. E. *et al.* Genome-wide compendium and functional assessment of in vivo  
572 heart enhancers. *Nat Commun* **7**, 12923, doi:10.1038/ncomms12923 (2016).
- 573 27 Franke, M. *et al.* CTCF knockout in zebrafish induces alterations in regulatory  
574 landscapes and developmental gene expression. *Nat Commun* **12**, 5415,  
575 doi:10.1038/s41467-021-25604-5 (2021).
- 576 28 Kubo, N. *et al.* Promoter-proximal CTCF binding promotes distal enhancer-dependent  
577 gene activation. *Nat Struct Mol Biol* **28**, 152-161, doi:10.1038/s41594-020-00539-5  
578 (2021).
- 579 29 Mumbach, M. R. *et al.* HiChIP: efficient and sensitive analysis of protein-directed  
580 genome architecture. *Nat Methods* **13**, 919-922, doi:10.1038/nmeth.3999 (2016).
- 581 30 Hsieh, T. S. *et al.* Resolving the 3D Landscape of Transcription-Linked Mammalian  
582 Chromatin Folding. *Mol Cell* **78**, 539-553 e538, doi:10.1016/j.molcel.2020.03.002  
583 (2020).
- 584 31 Bhattacharyya, S., Chandra, V., Vijayanand, P. & Ay, F. Identification of significant  
585 chromatin contacts from HiChIP data by FitHiChIP. *Nat Commun* **10**, 4221,  
586 doi:10.1038/s41467-019-11950-y (2019).
- 587 32 Nora, E. P. *et al.* Targeted Degradation of CTCF Decouples Local Insulation of  
588 Chromosome Domains from Genomic Compartmentalization. *Cell* **169**, 930-944 e922,  
589 doi:10.1016/j.cell.2017.05.004 (2017).
- 590 33 Hang, C. *et al.* Knockout of MYOM1 in human cardiomyocytes leads to myocardial  
591 atrophy via impairing calcium homeostasis. *J Cell Mol Med* **25**, 1661-1676,  
592 doi:10.1111/jcmm.16268 (2021).
- 593 34 Osterwalder, M. *et al.* Enhancer redundancy provides phenotypic robustness in  
594 mammalian development. *Nature* **554**, 239-243, doi:10.1038/nature25461 (2018).
- 595 35 Corces, M. R. *et al.* An improved ATAC-seq protocol reduces background and enables  
596 interrogation of frozen tissues. *Nat Methods* **14**, 959-962, doi:10.1038/nmeth.4396  
597 (2017).
- 598 36 Csardi G, N. T. The igraph software package for complex network research. *Int. J.*  
599 *Complex Syst.* (2006).
- 600

A

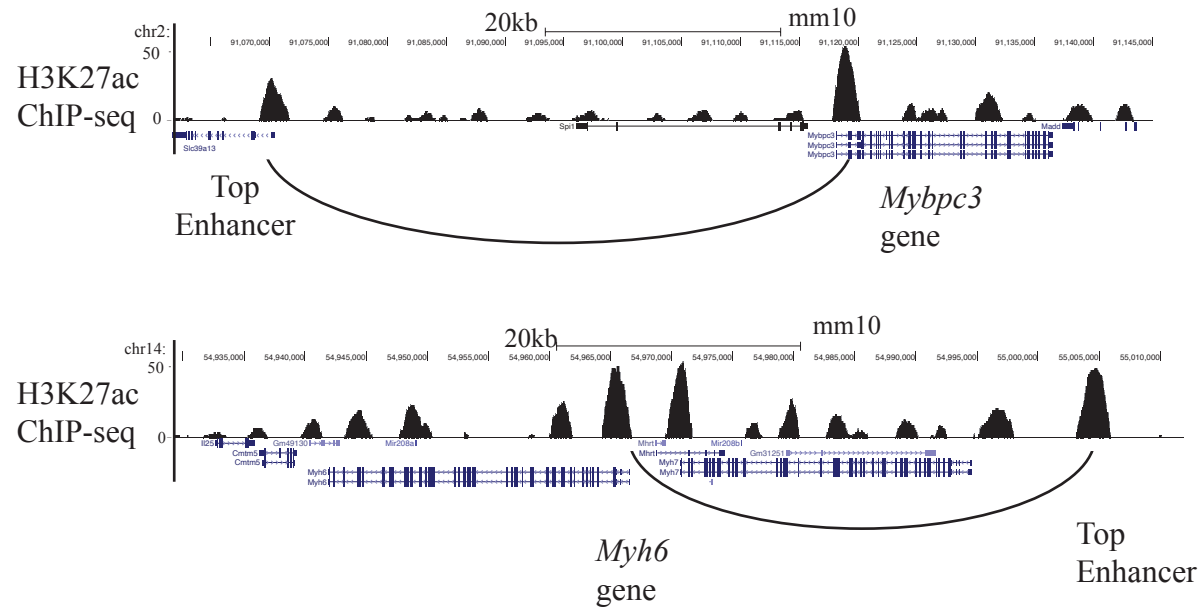

B

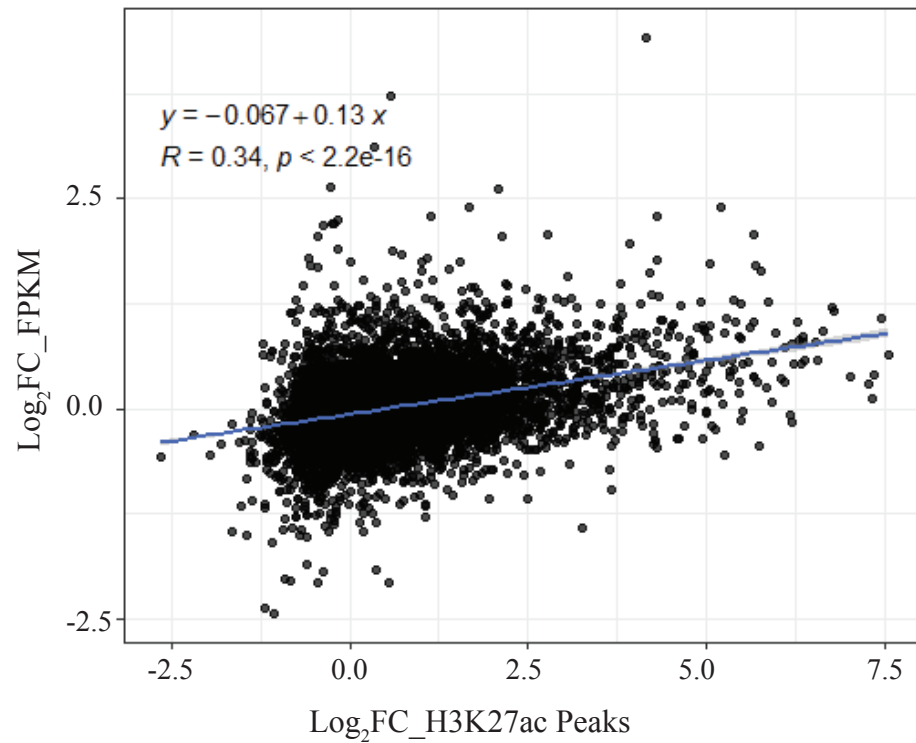



A

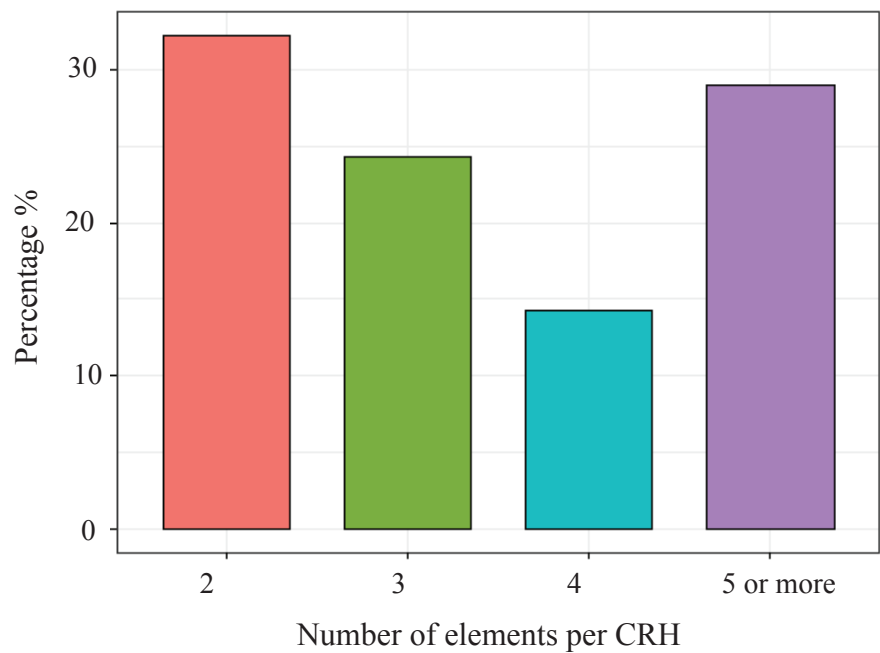

B

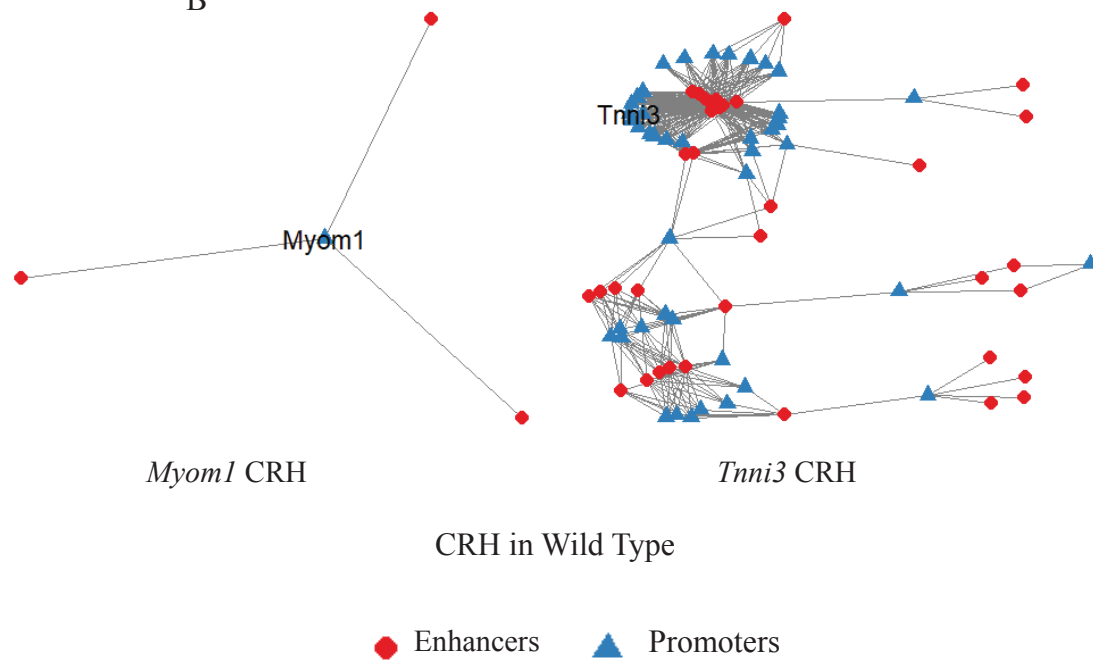

C

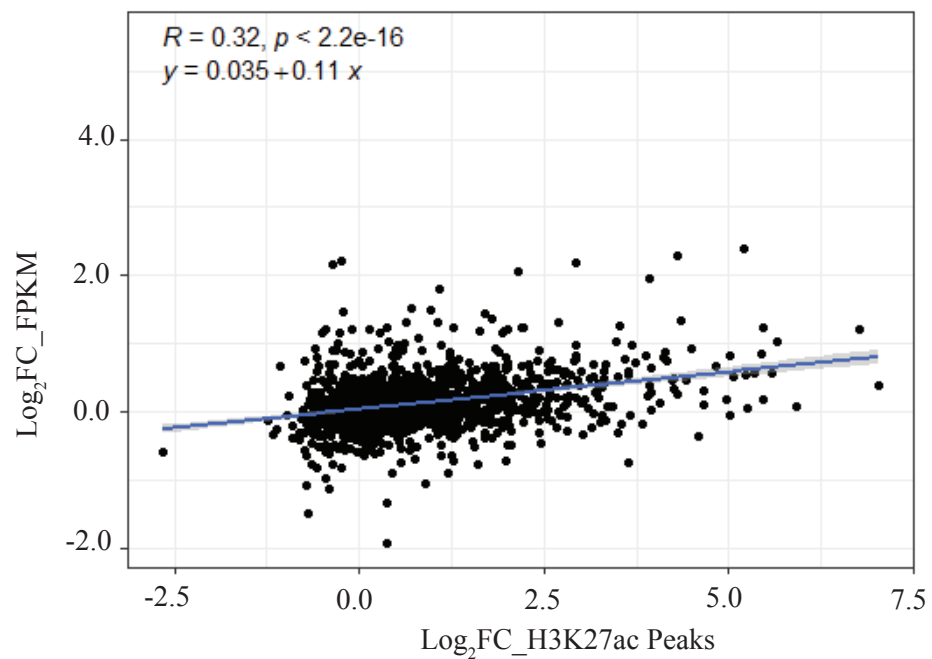

D

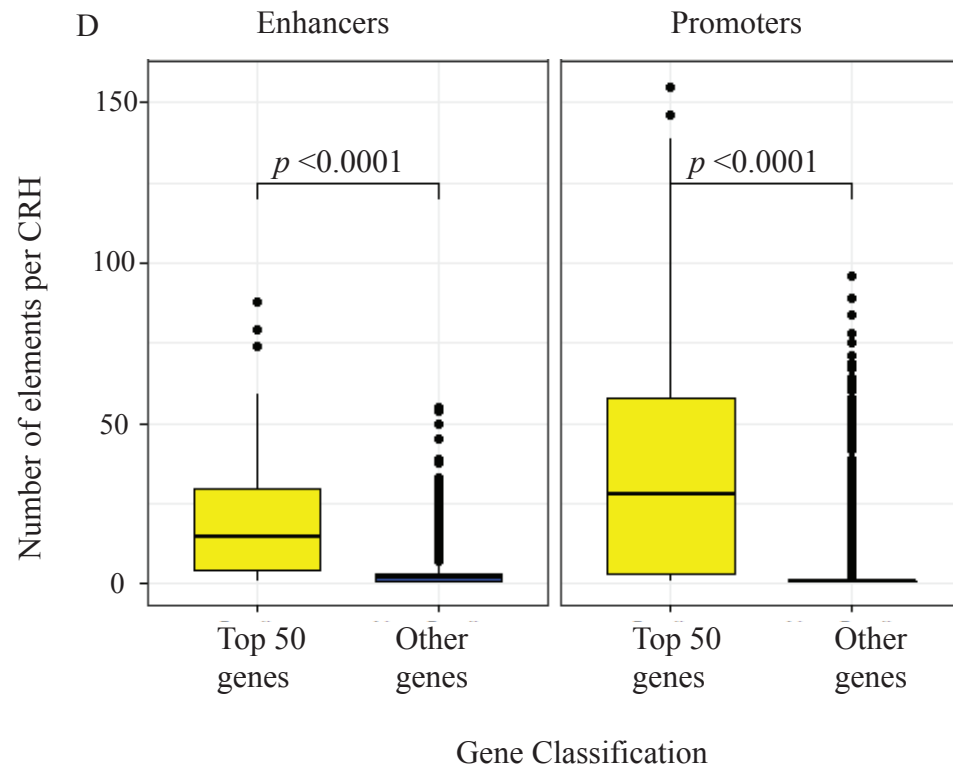

A

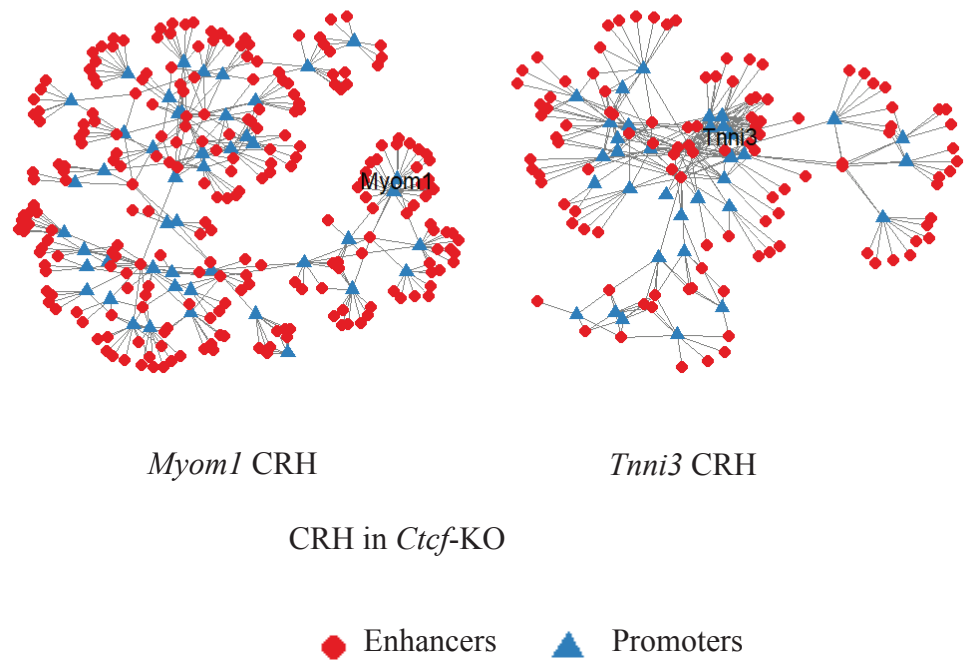

B

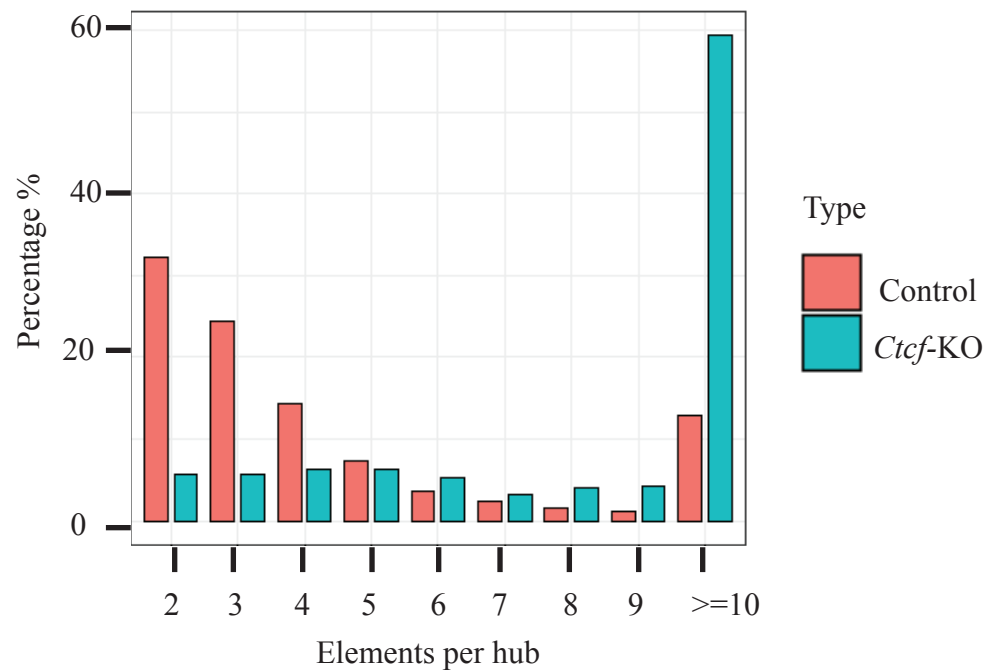

C

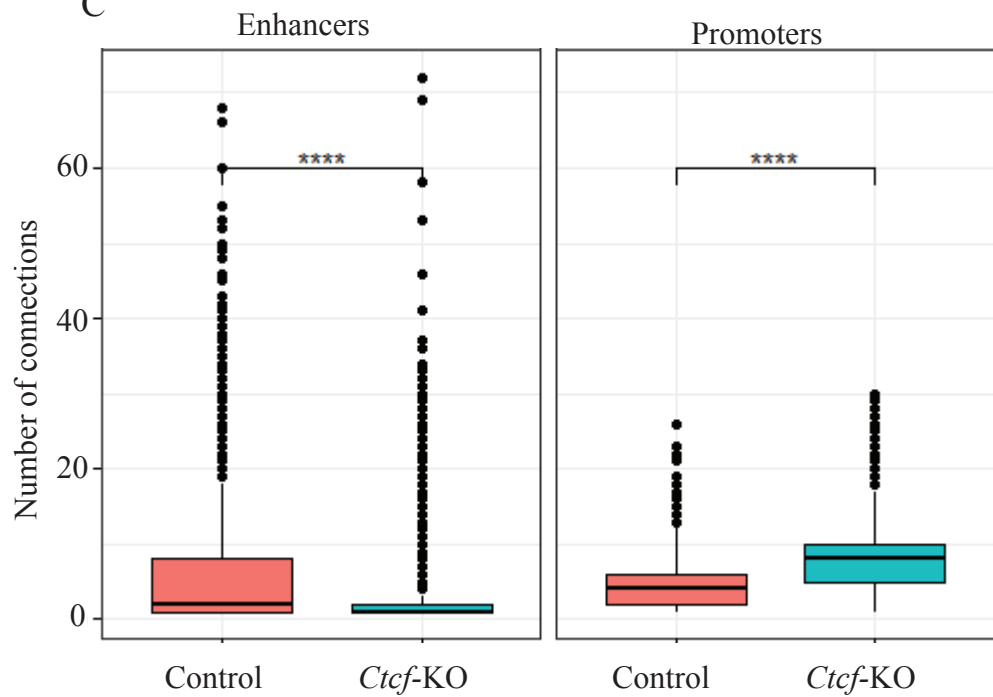

D

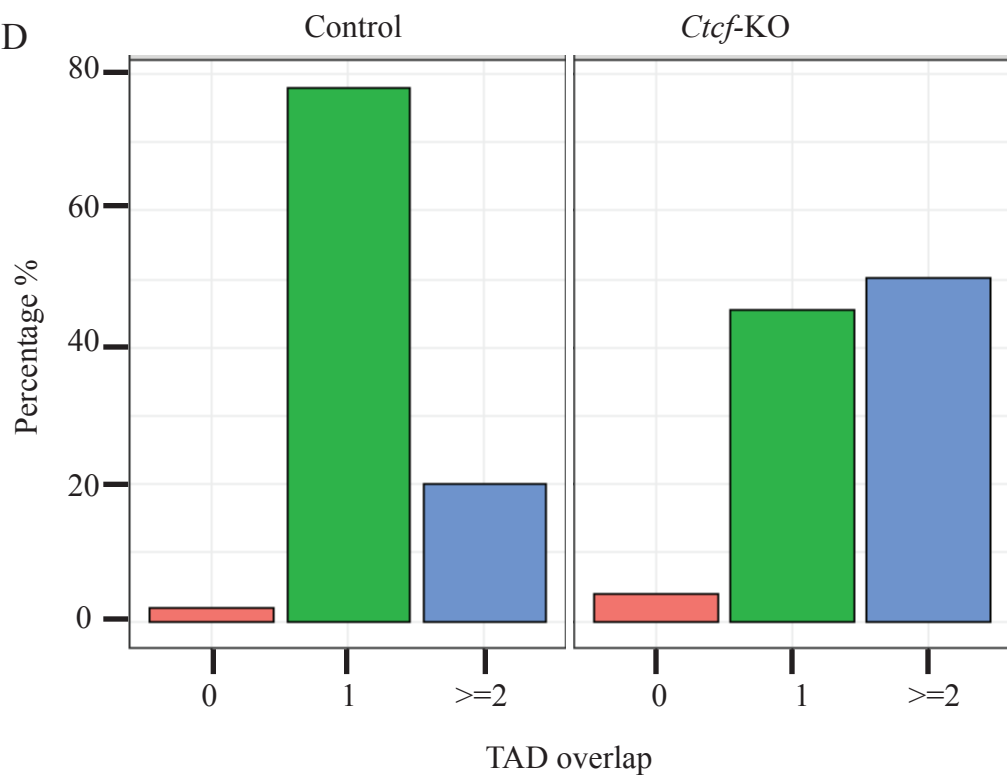



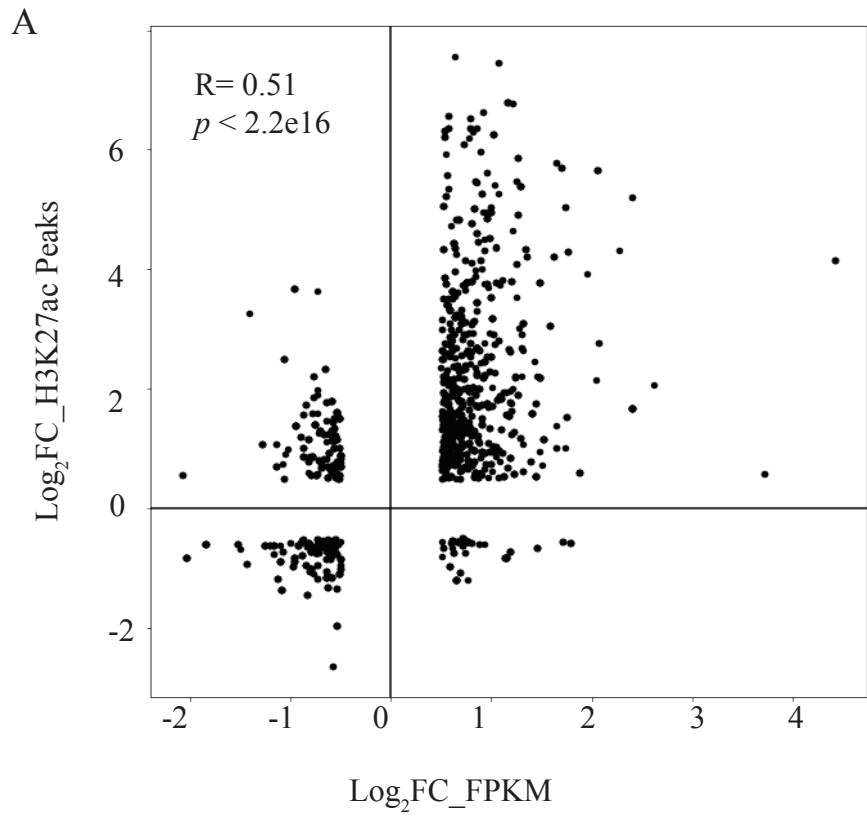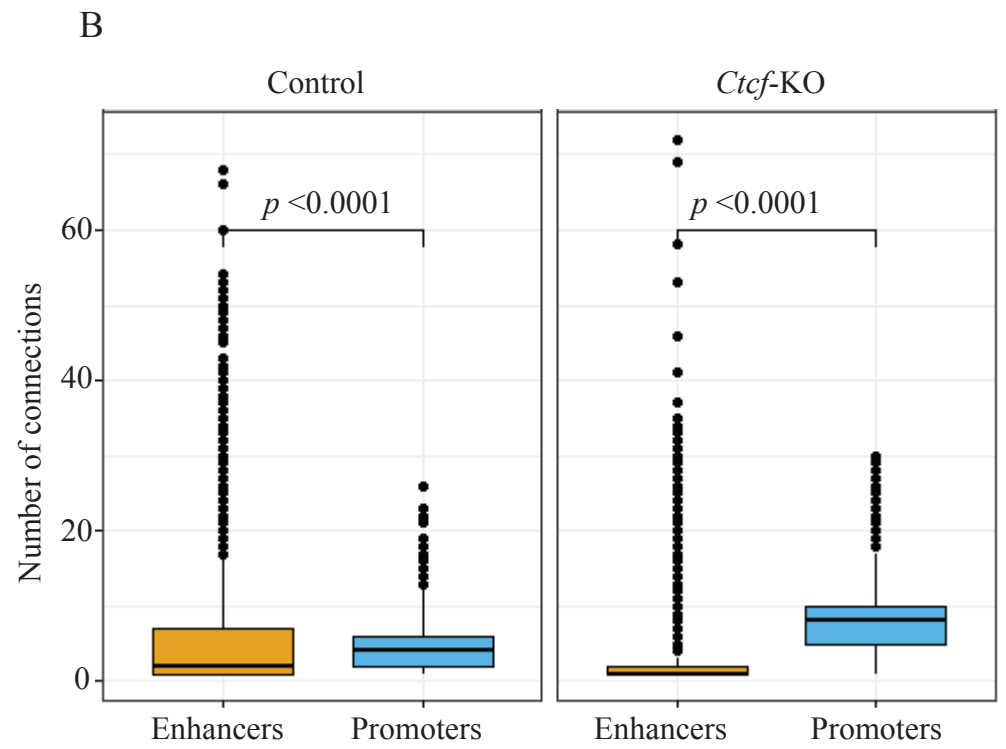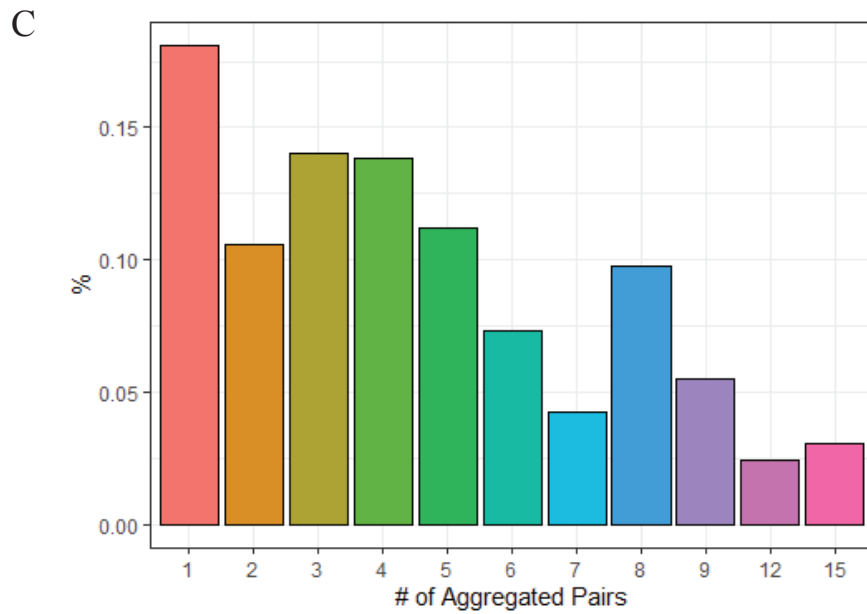

Supplementary Figure
